# Supplementary material
Source: PubMed Central journal article supplement (PMC3318959)
Supplement: NIHMS357021-supplement-Data_Supplements.pdf [file NIHMS357021-supplement-Data_Supplements.pdf]

**Table 1. Voxelwise Comparison of the Frequency of Hyperactivation to the Frequency of Hypoactivation in Patients With PTSD, Relative to Matched Comparison Subjects**

| Region                                                           | Side                | Montreal Neurologic Institute Coordinates |     |     | Voxels |
|------------------------------------------------------------------|---------------------|-------------------------------------------|-----|-----|--------|
|                                                                  |                     | x                                         | y   | z   |        |
| PTSD subjects                                                    | comparison subjects |                                           |     |     |        |
| Amygdala                                                         | Right               | 26                                        | 2   | -28 | 77     |
| Amygdala, parahippocampal gyrus                                  | Left                | -18                                       | -2  | -28 | 48     |
| Insula                                                           | Right               | 44                                        | -6  | 18  | 74     |
| Inferior parietal lobule                                         | Right               | 66                                        | -46 | 24  | 41     |
| Mid-cingulate                                                    | Right/Left          | 0                                         | -16 | 34  | 131    |
| Precuneus                                                        | Left                | -12                                       | -46 | 46  | 277    |
| Comparison subjects                                              | PTSD                |                                           |     |     |        |
| Inferior occipital gyrus                                         | Left                | -34                                       | -82 | -20 | 248    |
| Ventromedial prefrontal cortex/rostral anterior cingulate cortex | Right/Left          | 2                                         | 38  | -14 | 991    |
| Parahippocampal, lingual gyri                                    | Left                | -20                                       | -48 | -12 | 312    |
| Middle temporal gyrus                                            | Left                | -62                                       | -22 | -16 | 103    |
| Dorsal amygdala, anterior hippocampus                            | Left                | -16                                       | -8  | -12 | 53     |
| Orbitofrontal cortex                                             | Left                | -14                                       | 20  | -12 | 88     |
| Parahippocampal gyrus                                            | Left                | -14                                       | -26 | -8  | 197    |
| Orbitofrontal cortex                                             | Right               | 20                                        | 52  | -12 | 33     |
| Putamen                                                          | Right               | 32                                        | -6  | -8  | 39     |
| Putamen                                                          | Right               | 34                                        | -12 | 4   | 275    |
| Middle occipital gyrus                                           | Left                | -32                                       | -88 | 4   | 107    |
| Dorsomedial prefrontal cortex                                    | Left                | -12                                       | 50  | 20  | 245    |
| Dorsomedial prefrontal cortex                                    | Right               | 18                                        | 52  | 22  | 43     |
| Dorsomedial prefrontal cortex                                    | Right               | 12                                        | 46  | 22  | 23     |
| Dorsal anterior cingulate cortex                                 | Right/Left          | 2                                         | 14  | 24  | 282    |

|               |       |   |    |    |     |
|---------------|-------|---|----|----|-----|
|               | t     |   |    |    |     |
| Mid-cingulate | Right | 8 | -2 | 46 | 141 |

<sup>a</sup>All peak voxel p 0.001.

**Table 2. Voxelwise Comparison of the Frequency of Hyperactivation to the Frequency of Hypoactivation in Patients with Social Anxiety Disorder, Relative to Matched Comparison Subjects<sup>a</sup>**

| Region                                               | Side  | Montreal Neurologic Institute Coordinates |     |     | Voxels |
|------------------------------------------------------|-------|-------------------------------------------|-----|-----|--------|
|                                                      |       | x                                         | y   | z   |        |
| Social anxiety disorder subjects comparison subjects |       |                                           |     |     |        |
| Amygdala, parahippocampal gyrus                      | Left  | -24                                       | -6  | -28 | 541    |
| Fusiform gyrus                                       | Right | 32                                        | -26 | -28 | 32     |
| Amygdala, parahippocampal gyrus                      | Right | 16                                        | -2  | -24 | 286    |
| Parahippocampal gyrus                                | Right | 22                                        | -14 | -26 | 46     |
| Globus pallidus                                      | Left  | -16                                       | -10 | -4  | 76     |
| Insula                                               | Left  | -36                                       | 16  | -2  | 23     |
| Inferior frontal gyrus                               | Right | 42                                        | 34  | 4   | 291    |
| Insula                                               | Right | 40                                        | -8  | 12  | 207    |
| Insula                                               | Left  | -40                                       | -4  | 6   | 35     |
| Superior temporal gyrus                              | Left  | -46                                       | -56 | 10  | 26     |

<sup>a</sup>All peak voxel p 0.001.

**Table 3. Voxelwise Comparison of the Frequency of Hyperactivation to the Frequency of Hypoactivation in Patients With Specific Phobia, Relative to Matched Comparison Subjects<sup>a</sup>**

| Region                   | Side       | Montreal Neurologic Institute Coordinates |     |     | Voxels |
|--------------------------|------------|-------------------------------------------|-----|-----|--------|
|                          |            | x                                         | y   | z   |        |
| Specific phobia subjects |            |                                           |     |     |        |
| comparison subjects      |            |                                           |     |     |        |
| Amygdala                 | Right      | 26                                        | 0   | -16 | 220    |
| Amygdala                 | Left       | -22                                       | -4  | -14 | 53     |
| Fusiform gyrus           | Right      | 24                                        | -74 | -8  | 155    |
| Substantia nigra         | Left       | -16                                       | -10 | -10 | 13     |
| Insula                   | Left       | -38                                       | 6   | 0   | 342    |
| Insula                   | Right      | 36                                        | 16  | 8   | 266    |
| Mid-cingulate            | Right/Left | 0                                         | 0   | 40  | 52     |

<sup>a</sup>All peak voxel p 0.001.

**Table 4. Summary of the Included Studies for the Meta-Analysis of Functional Neuroimaging Studies of Fear Conditioning in Healthy Subjects**

| Reference                       | Subjects | Stimulation                                                               |
|---------------------------------|----------|---------------------------------------------------------------------------|
| Armony and Dolan (2002) (46)    | 10       | Angry face conditioned stimulus, white noise unconditioned stimulus       |
| Buchel et al. (1999) (47)       | 11       | Tone conditioned stimulus, aversive tone unconditioned stimulus           |
| Buchel et al. (1998) (48)       | 9        | Visual conditioned stimulus, aversive tone unconditioned stimulus         |
| Critchley et al. (2002) (49)    | 6        | Angry face conditioned stimulus, white noise unconditioned stimulus       |
| Gottfried and Dolan (2004) (50) | 18       | Neutral face conditioned stimulus, unpleasant odor unconditioned stimulus |
| Gottfried et al. (2002) (51)    | 17       | Neutral face conditioned stimulus, unpleasant odor unconditioned stimulus |
| Jensen et al. (2003) (52)       | 11       | Visual conditioned stimulus, electric shock unconditioned stimulus        |
| Knight et al. (2005) (53)       | 9        | Tone conditioned stimulus, aversive tone unconditioned stimulus           |
| Phelps et al. (2004) (54)       | 18       | Visual conditioned stimulus, electric shock unconditioned stimulus        |
| Yaguez et al. (2005) (55)       | 8        | Visual conditioned stimulus, esophageal distention unconditioned stimulus |

**Table 5. Results That Identify Regions Significantly Activated During Fear Conditioning in Healthy Subjects<sup>a</sup>**

| Fear Conditioning                       | Side       | Montreal Neurologic Institute Coordinates |     |     | Voxels |
|-----------------------------------------|------------|-------------------------------------------|-----|-----|--------|
|                                         |            | x                                         | y   | z   |        |
| Region                                  |            |                                           |     |     |        |
| Amygdala                                | Right      | 22                                        | -4  | -20 | 42     |
| Orbitofrontal cortex                    | Left       | -26                                       | 52  | -14 | 58     |
| Substantia nigra/ventral tegmental area | Left       | -4                                        | -20 | -14 | 71     |
| Substantia nigra/ventral tegmental area | Right      | 10                                        | -14 | -10 | 118    |
| Putamen                                 | Right      | 32                                        | 10  | -6  | 11     |
| Insula                                  | Right      | 42                                        | 14  | 6   | 516    |
| Insula                                  | Left       | -32                                       | 20  | 8   | 330    |
| Anterior thalamus                       | Left       | -10                                       | -6  | 8   | 17     |
| Anterior thalamus                       | Right      | 10                                        | -4  | 8   | 39     |
| Globus pallidus                         | Left       | -12                                       | 4   | 2   | 15     |
| Inferior parietal lobule                | Right      | 58                                        | -42 | 24  | 226    |
| Mid-cingulate                           | Right/Left | 0                                         | 12  | 36  | 430    |

<sup>a</sup>All peak voxel p 0.001.

**Figure 1. Patterns of Coactivation Correlations in Either the Positive (black lines) or Inverse (blue lines) Directions for the Combination of the Social Anxiety Disorder and Specific Phobia Data Sets<sup>a</sup>**

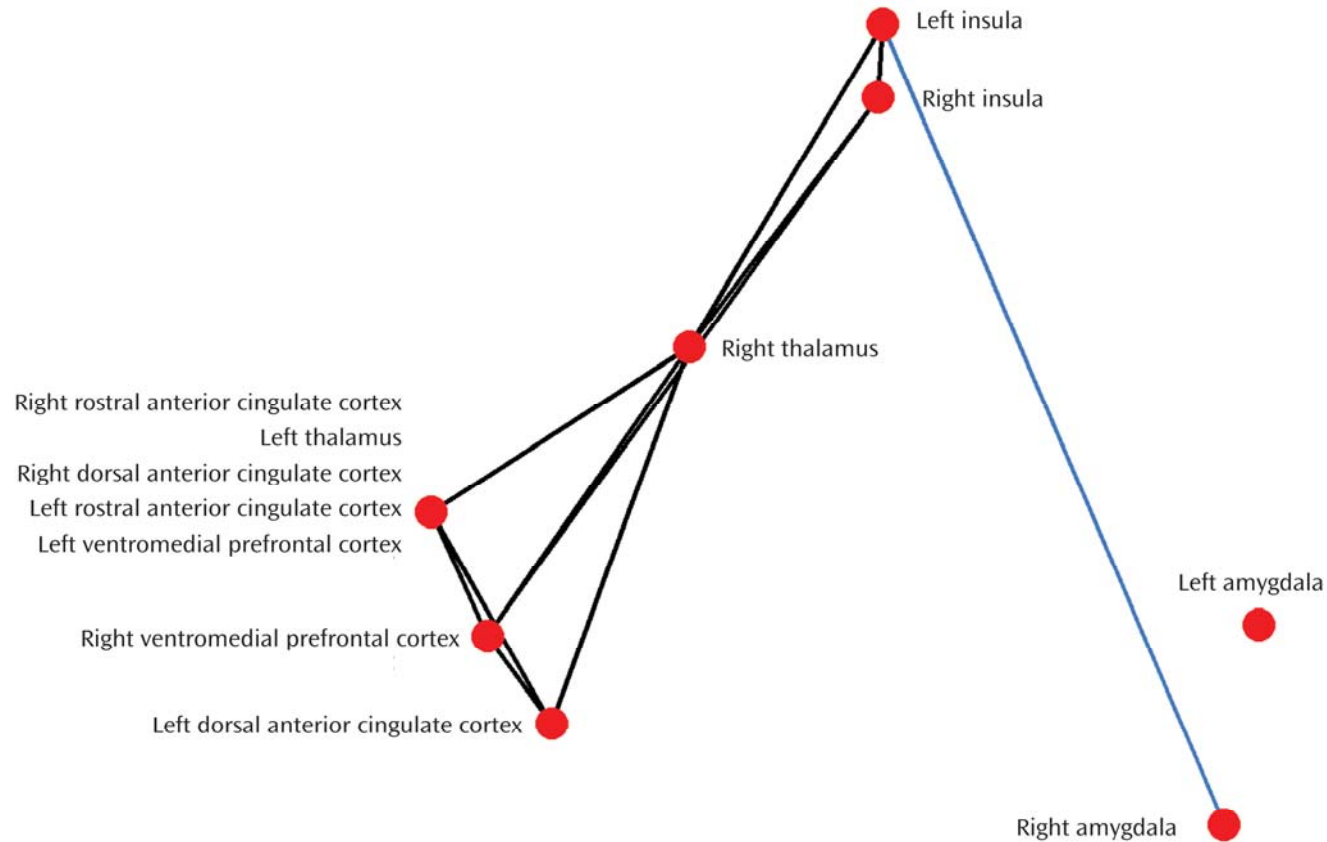

<sup>a</sup>Regions of interest are plotted along dimensions of the first two principle components on the x and y axes, respectively (axes not shown). Solid lines represent  $p < 0.05$  false-discovery-rate corrected, whereas dotted lines represent  $p < 0.05$ , uncorrected. Co-localization of multiple regions of interest to the same dot in C reflects the fact that only a single study reported activation in all of these regions (44) and thus

artificially affects data for these regions within the social anxiety disorder/specific phobia data set only. We found that a pattern of negative coactivation correlation (i.e., inverse effects) was found significantly more frequently in PTSD than in social anxiety disorder/specific phobia between the right dorsal anterior cingulate cortex and the right insula ( $p=0.02$ ).
